# Supplementary material for: Enhanced anticancer effect of lysozyme-functionalized metformin-loaded shellac nanoparticles on a 3D cell model: role of the nanoparticle and payload concentrations
Source: Royal Society of Chemistry journal article supplement (doi:10.1039/d4bm00692e), 2024-01-01
Supplement: d4bm00692e1.pdf [file d4bm00692e1.pdf]

## Supporting information

### Enhanced anticancer effect of lysozyme-functionalized metformin-loaded shellac nanoparticles on a 3D cell model: Role of the nanoparticle and payload concentrations

Anheng Wang,<sup>a,b</sup> Leigh A. Madden,<sup>c</sup> and Vesselin N. Paunov<sup>\*,d</sup>

<sup>a</sup> *Institute of Chinese Medical Sciences & State Key Laboratory of Quality Research in Chinese Medicine, University of Macau, Macau SAR, China*

<sup>b</sup> *Zhuhai UM Science and Technology Research Institute, University of Macau, Hengqin, Guangdong, China*

<sup>c</sup> *Centre for Biomedicine, Hull York Medical School, University of Hull, HU67RX, U.K.*

<sup>d</sup> *Department of Chemistry, Nazarbayev University, 53 Kabanbay Batyr Avenue, Astana, 010000, Kazakhstan.*

*\*Corresponding author email: vesselin.paunov@nu.edu.kz*

---

*(Biomaterials Science 2024)*

### Contents

|                                                                                                                                   |   |
|-----------------------------------------------------------------------------------------------------------------------------------|---|
| Schematic for the preparation of the lysozyme coated metformin-loaded shellac NPs.....                                            | 2 |
| Zeta-potential distribution of 0.2 wt% Shellac-0.1 wt% Metformin-0.25wt% P407 coated at different concentration of lysozyme ..... | 3 |
| Zeta-potential of 0.2wt% Shellac-0.1 wt% Metformin-0.25wt% P407 coated at different concentration of lysozyme.....                | 4 |
| SEM images of 0.2wt% Shellac-0.25wt% Lysozyme-0.2wt% Metformin-0.25wt% P407 NPs at different magnifications.....                  | 5 |
| Estimate of the metformin loading per shellac nanoparticle.....                                                                   | 5 |

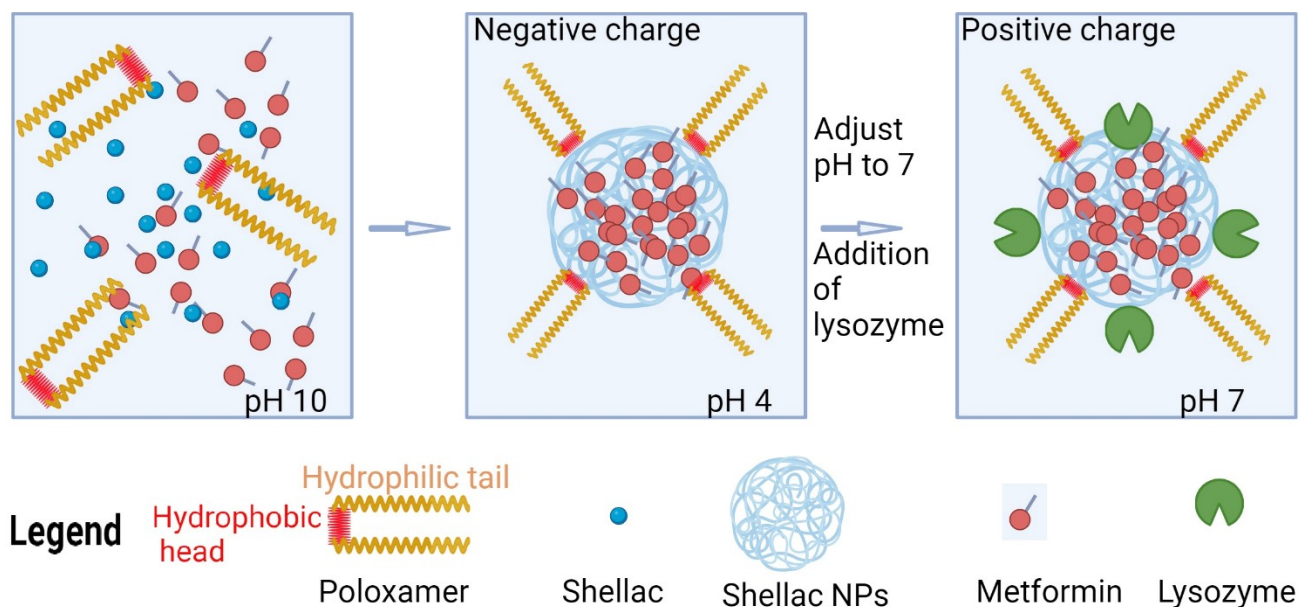

Figure S1. Schematic for the preparation of the lysozyme coated metformin-loaded shellac NPs. Stage 1 includes co-precipitation of an aqueous solution of metformin, Poloxamer 407 and shellac induced by a pH drop from 10 to 4. The metformin-loaded nanoparticles are sterically stabilized by the Poloxamer 407. Stage 2 includes adjusting the pH to 7 and coating with a cationic protease (lysozyme) achieved by electrostatically driven adsorption.

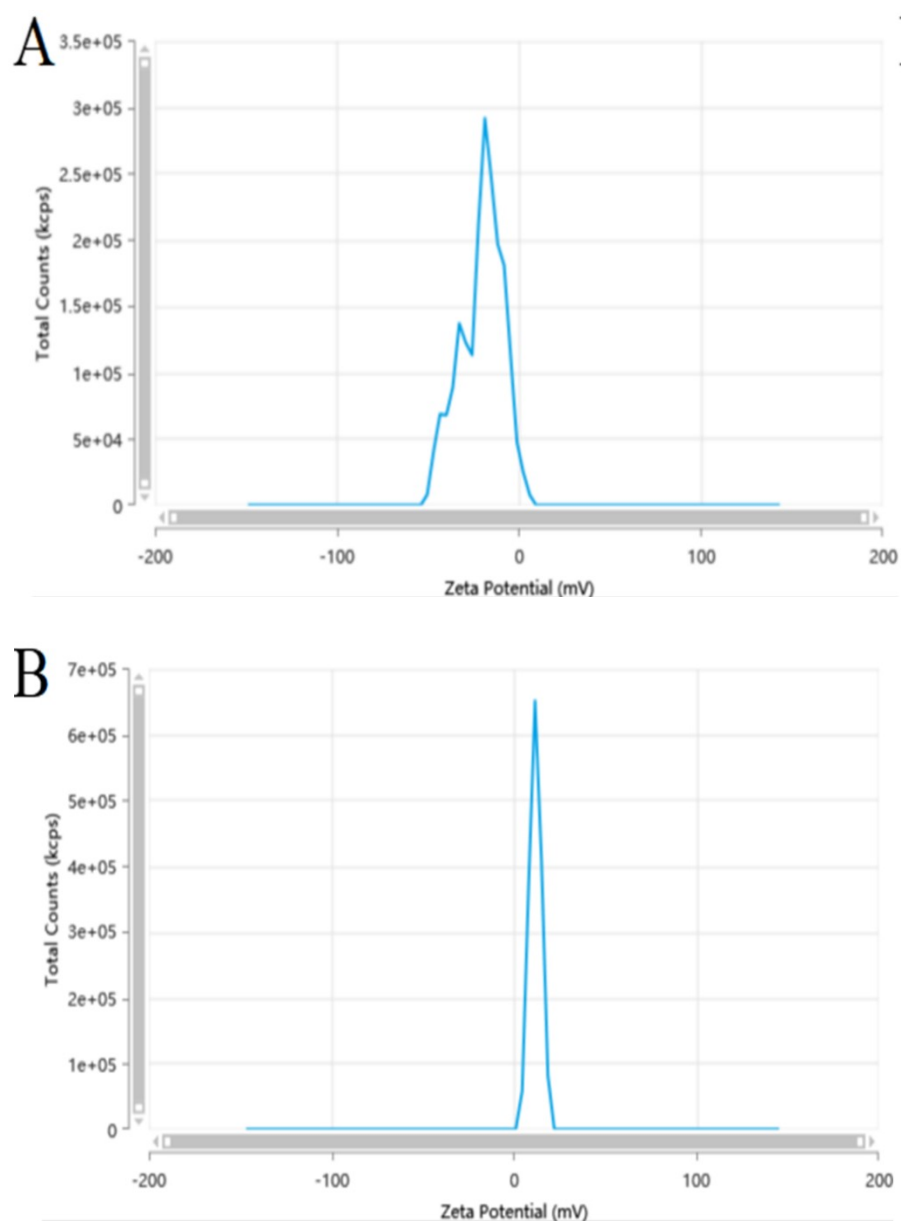

Figure S2: Zeta-potential distribution of 0.2 wt% Shellac-0.1 wt% Metformin-0.25wt% P407 coated at different concentration of lysozyme: (A) 0 wt% lysozyme; (B) 0.25 wt% lysozyme.

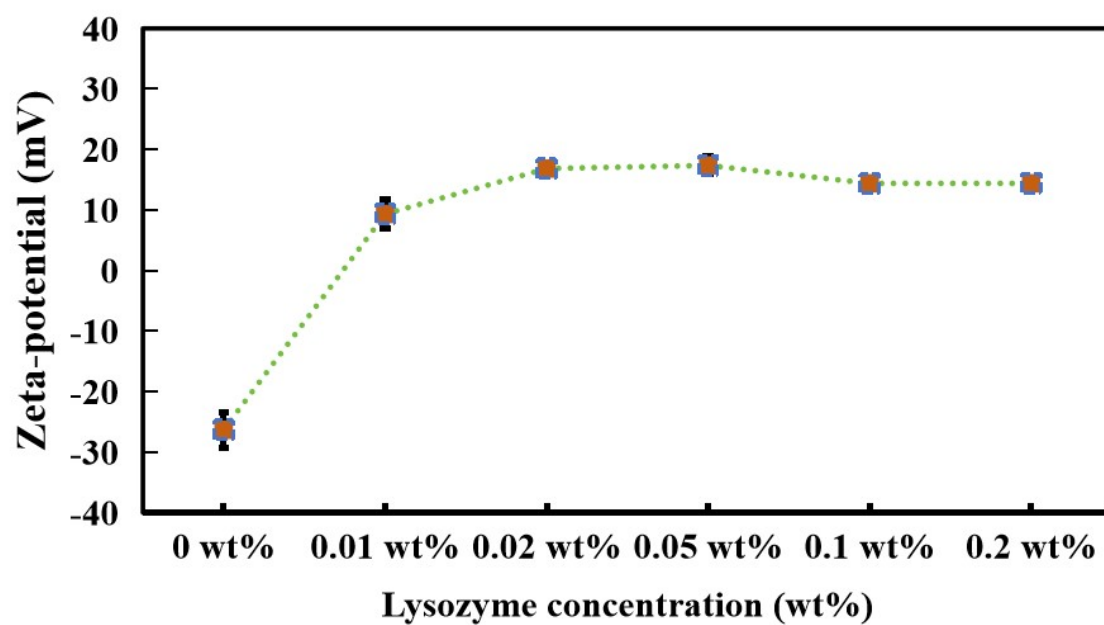

Figure S3: Zeta-potential of 0.2wt% Shellac-0.1 wt% Metformin-0.25wt% P407 coated at different concentration of lysozyme.

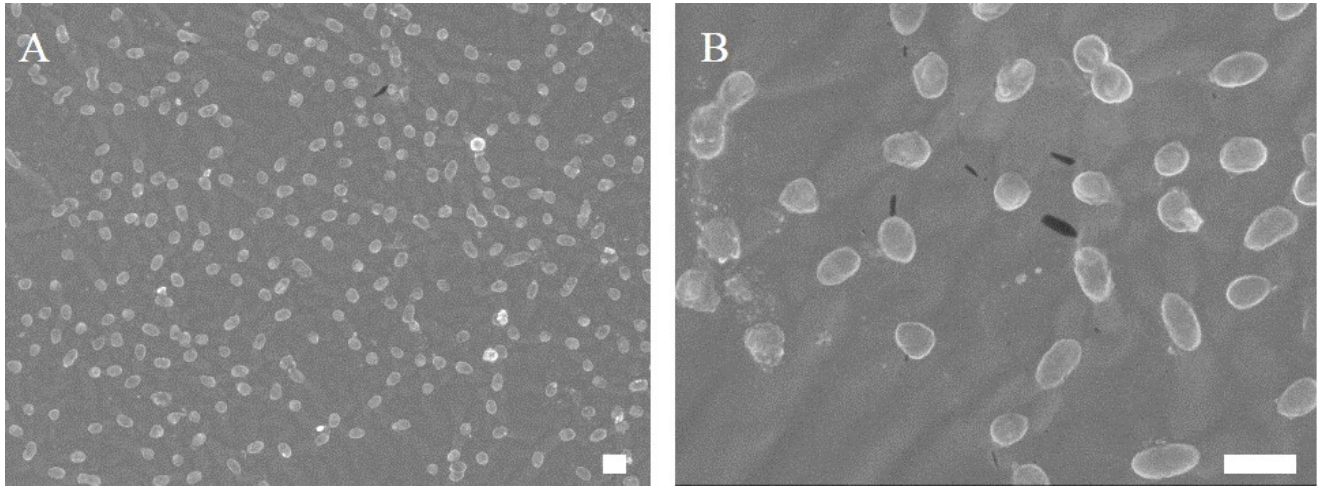

Figure S4: SEM observation of the 1000 times diluted 0.2wt% Shellac-0.25wt% Lysozyme- 0.2wt% Metformin- 0.25wt% P407 NPs with different magnification. The scale bar is 100 nm.

#### Estimate of the metformin loading per shellac nanoparticle

A rough estimate of the number of metformin molecules per nanoparticle can be obtained by estimation of the number of nanoparticles per 100 g of dispersion at fixed amount of. With shellac density being  $1.035 \text{ g/cm}^3$  and average particle diameter 60 nm and shellac concentration 0.2 wt%, the number of particles is

$$N_p = 100 \times 0.2 / 100 / 1.035 / (4\pi / 3 \times (30 \times 10^{-7})^3) = 1.71 \times 10^{15}$$

For overall concentrations of metformin of 0.1 wt% and 90% encapsulation efficiency, one can estimate the total number of metformin molecules encapsulated in 100 g of dispersion:

$$N_{met} = 100 \times 0.1 / 100 / 129 \times 6.02 \times 10^{23} \times (90 / 100) = 4.65 \times 10^{20}$$

Thus, a typical number of metformin molecules per shellac nanoparticle is

$$N_{met\_per\_particle} = N_{met} / N_p = 1.71 \times 10^{20} / 2.96 \times 10^{15} = 2.45 \times 10^5$$

This estimate is done without taking into account the contribution of the encapsulated metformin to the size of the nanoparticle.
